# Supplementary material for: Microbial Populations in Naked Neck Chicken Ceca Raised on Pasture Flock Fed with Commercial Yeast Cell Wall Prebiotics via an Illumina MiSeq Platform
Source: PubMed Central journal article supplement (PMC4798181; doi:10.1371/journal.pone.0151944), 2016-03-18

# Phylum

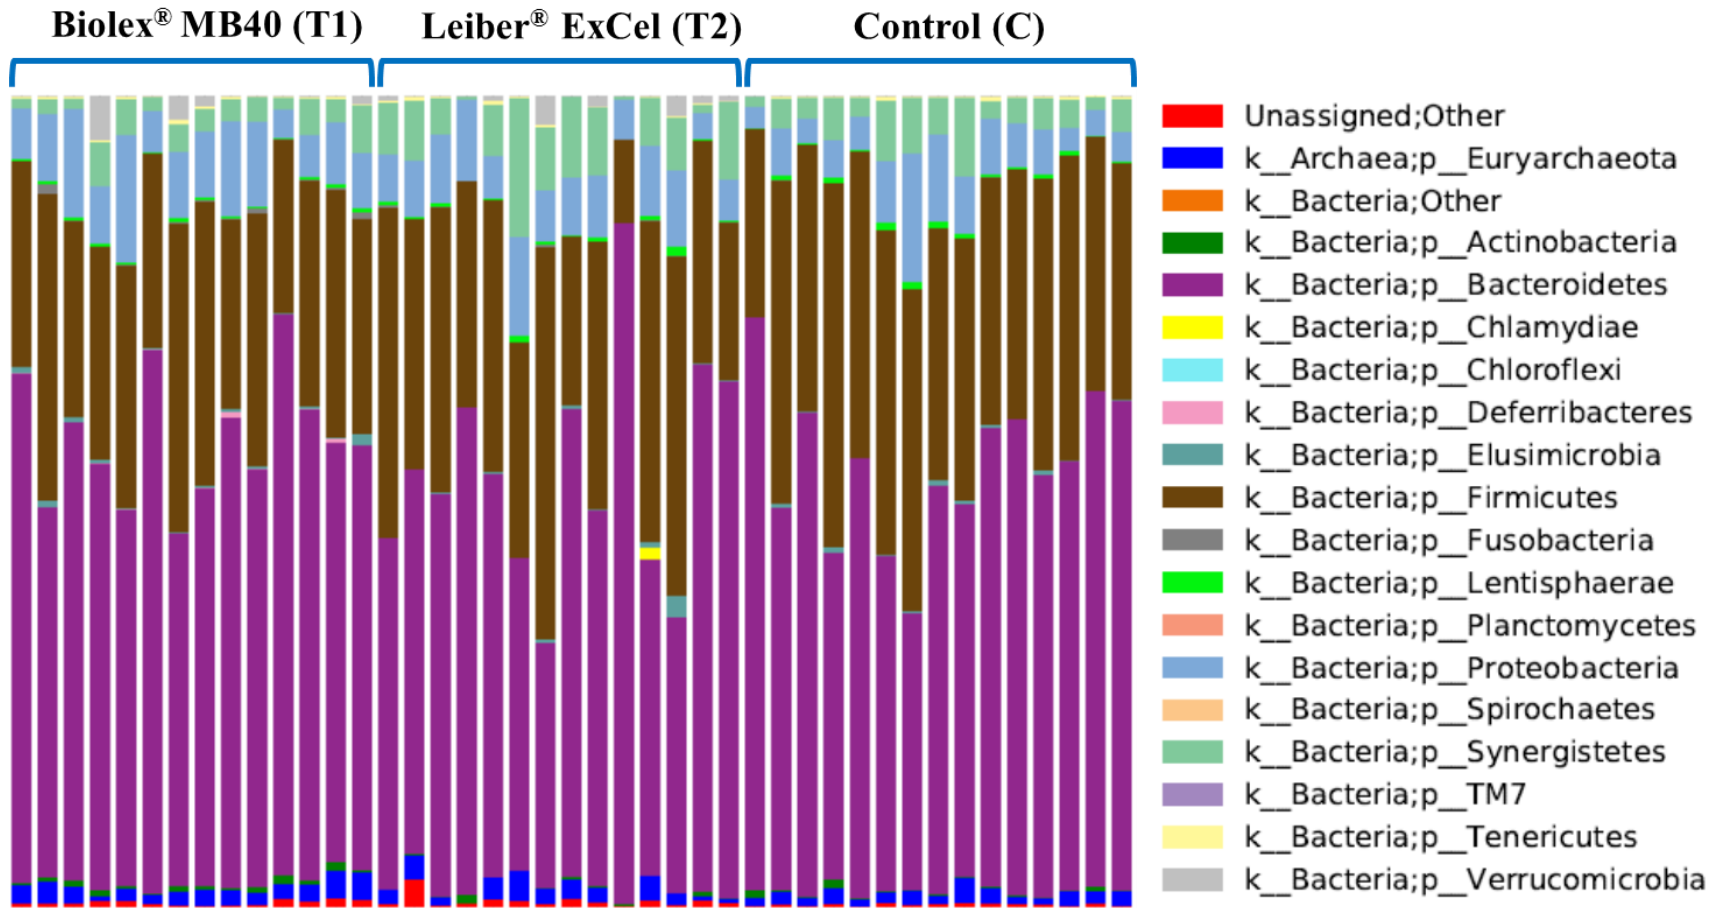

# Class

Biolex® MB40 (T1)

Leiber® ExCel (T2)

Control (C)

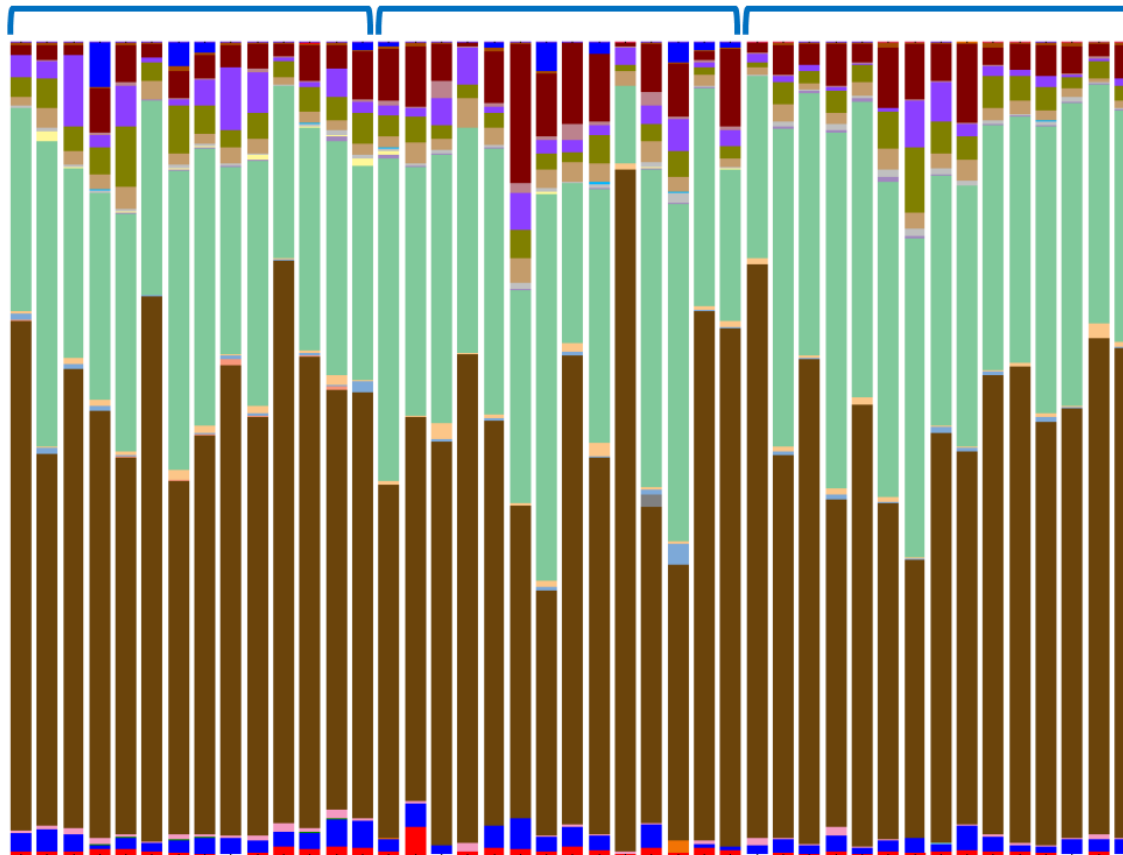

- Unassigned;Other;Other
- k\_Archaea;p\_Euryarchaeota;c\_Methanobacteria
- k\_Archaea;p\_Euryarchaeota;c\_Methanomicrobia
- k\_Archaea;p\_Euryarchaeota;c\_Thermoplasmata
- k\_Bacteria;Other;Other
- k\_Bacteria;p\_Actinobacteria;c\_Acidimicrobiia
- k\_Bacteria;p\_Actinobacteria;c\_Actinobacteria
- k\_Bacteria;p\_Actinobacteria;c\_Coriobacteriia
- k\_Bacteria;p\_Actinobacteria;c\_Thermoleophilla
- k\_Bacteria;p\_Bacteroidetes;c\_Bacteroidia
- k\_Bacteria;p\_Chlamydiae;c\_Chlamydiia
- k\_Bacteria;p\_Chloroflexi;c\_Thermomicrobia
- k\_Bacteria;p\_Deferribacteres;c\_Deferribacteres
- k\_Bacteria;p\_Elusimicrobia;c\_Elusimicrobia
- k\_Bacteria;p\_Firmicutes;c\_Bacilli
- k\_Bacteria;p\_Firmicutes;c\_Clostridia
- k\_Bacteria;p\_Firmicutes;c\_Erysipelotrichi
- k\_Bacteria;p\_Fusobacteria;c\_Fusobacteriia
- k\_Bacteria;p\_Lentisphaerae;c\_[Lentisphaeria]
- k\_Bacteria;p\_Planctomycetes;c\_Planctomycetia
- k\_Bacteria;p\_Proteobacteria;c\_Alphaproteobacteria
- k\_Bacteria;p\_Proteobacteria;c\_Betaproteobacteria
- k\_Bacteria;p\_Proteobacteria;c\_Deltaproteobacteria
- k\_Bacteria;p\_Proteobacteria;c\_Epsilonproteobacteria
- k\_Bacteria;p\_Proteobacteria;c\_Gammaproteobacteria
- k\_Bacteria;p\_Spirochaetes;c\_Spirochaetes
- k\_Bacteria;p\_Synergistetes;c\_Synergistia
- k\_Bacteria;p\_TM7;c\_TM7-3
- k\_Bacteria;p\_Tenericutes;c\_Mollicutes
- k\_Bacteria;p\_Verrucomicrobia;c\_Opitutae
- k\_Bacteria;p\_Verrucomicrobia;c\_Verrucomicrobiae
- k\_Bacteria;p\_Verrucomicrobia;c\_[Spartobacteria]

# Order

Biolex<sup>®</sup> MB40 (T1)

Leiber<sup>®</sup> ExCel (T2)

Control (C)

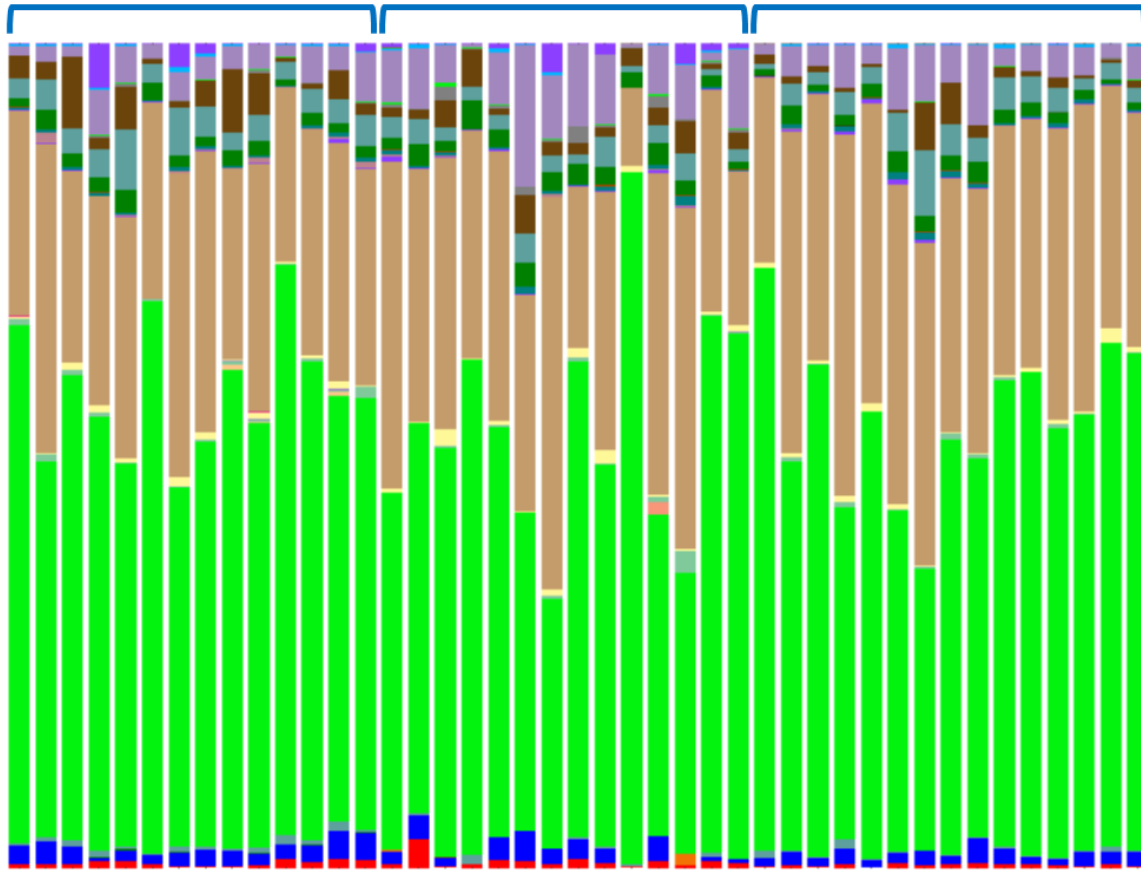

- Unassigned;Other;Other;Other
- k\_Archaea;p\_Euryarchaeota;c\_Methanobacteria;o\_Methanobacteriales
- k\_Archaea;p\_Euryarchaeota;c\_Methanomicrobia;o\_Methanomicrobiales
- k\_Archaea;p\_Euryarchaeota;c\_Thermoplasmata;o\_E2
- k\_Bacteria;Other;Other;Other
- k\_Bacteria;p\_Actinobacteria;c\_Acidimicrobia;o\_Acidimicrobiales
- k\_Bacteria;p\_Actinobacteria;c\_Actinobacteria;o\_Actinomycetales
- k\_Bacteria;p\_Actinobacteria;c\_Actinobacteria;o\_Bifidobacteriales
- k\_Bacteria;p\_Actinobacteria;c\_Coriobacteria;o\_Coriobacteriales
- k\_Bacteria;p\_Actinobacteria;c\_Thermoleophilla;o\_Gaelliales
- k\_Bacteria;p\_Actinobacteria;c\_Thermoleophilla;o\_Solirubrobacteriales
- k\_Bacteria;p\_Bacteroidetes;c\_Bacteroidia;o\_Bacteroidales
- k\_Bacteria;p\_Chlamydiae;c\_Chlamydia;o\_Chlamydiales
- k\_Bacteria;p\_Chloroflexi;c\_Thermomicrobia;o\_JG30-KF-CM45
- k\_Bacteria;p\_Deferribacteres;c\_Deferribacteres;o\_Deferribacterales
- k\_Bacteria;p\_Elusimicrobia;c\_Elusimicrobia;o\_Elusimicrobiales
- k\_Bacteria;p\_Firmicutes;c\_Bacilli;o\_Bacillales
- k\_Bacteria;p\_Firmicutes;c\_Bacilli;o\_Lactobacillales
- k\_Bacteria;p\_Firmicutes;c\_Bacilli;o\_Turcibacteriales
- k\_Bacteria;p\_Firmicutes;c\_Clostridia;Other
- k\_Bacteria;p\_Firmicutes;c\_Clostridia;o\_Clostridiales
- k\_Bacteria;p\_Firmicutes;c\_Clostridia;o\_SHA-98
- k\_Bacteria;p\_Firmicutes;c\_Erysipelotrichi;o\_Erysipelotrichales
- k\_Bacteria;p\_Fusobacteria;c\_Fusobacteria;o\_Fusobacteriales
- k\_Bacteria;p\_Lentisphaerae;c\_[Lentisphaeria];o\_Victivallales
- k\_Bacteria;p\_Planctomycetes;c\_Planctomycetia;o\_Gemmatales
- k\_Bacteria;p\_Proteobacteria;c\_Alphaproteobacteria;o\_
- k\_Bacteria;p\_Proteobacteria;c\_Alphaproteobacteria;o\_RF32
- k\_Bacteria;p\_Proteobacteria;c\_Alphaproteobacteria;o\_Rhizobiales
- k\_Bacteria;p\_Proteobacteria;c\_Alphaproteobacteria;o\_Rhodospirillales
- k\_Bacteria;p\_Proteobacteria;c\_Betaproteobacteria;Other
- k\_Bacteria;p\_Proteobacteria;c\_Betaproteobacteria;o\_Burkholderiales
- k\_Bacteria;p\_Proteobacteria;c\_Betaproteobacteria;o\_MND1
- k\_Bacteria;p\_Proteobacteria;c\_Betaproteobacteria;o\_Nitrosomonadales
- k\_Bacteria;p\_Proteobacteria;c\_Betaproteobacteria;o\_Rhodocyclales
- k\_Bacteria;p\_Proteobacteria;c\_Deltaproteobacteria;o\_Bdellovibrionales
- k\_Bacteria;p\_Proteobacteria;c\_Deltaproteobacteria;o\_Desulfovibrionales
- k\_Bacteria;p\_Proteobacteria;c\_Epsilonproteobacteria;o\_Campylobacteriales
- k\_Bacteria;p\_Proteobacteria;c\_Gammaproteobacteria;o\_Aeromonadales
- k\_Bacteria;p\_Proteobacteria;c\_Gammaproteobacteria;o\_Enterobacteriales
- k\_Bacteria;p\_Proteobacteria;c\_Gammaproteobacteria;o\_Legionellales
- k\_Bacteria;p\_Proteobacteria;c\_Gammaproteobacteria;o\_Pasteurellales
- k\_Bacteria;p\_Proteobacteria;c\_Gammaproteobacteria;o\_Pseudomonadales
- k\_Bacteria;p\_Spirochaetes;c\_Spirochaetes;o\_Sphaerochaetales
- k\_Bacteria;p\_Synergistetes;c\_Synergistia;o\_Synergistales
- k\_Bacteria;p\_TM7;c\_TM7-3;o\_I025
- k\_Bacteria;p\_Tenericutes;c\_Mollicutes;o\_Anaeroplasmatales
- k\_Bacteria;p\_Tenericutes;c\_Mollicutes;o\_Mycoplasmatales
- k\_Bacteria;p\_Tenericutes;c\_Mollicutes;o\_RF39
- k\_Bacteria;p\_Verrucomicrobia;c\_Opitutae;Other
- k\_Bacteria;p\_Verrucomicrobia;c\_Opitutae;o\_[Cerasiococcales]
- k\_Bacteria;p\_Verrucomicrobia;c\_Verrucomicrobiae;o\_Verrucomicrobiales
- k\_Bacteria;p\_Verrucomicrobia;c\_[Spartobacteria];o\_[Chthoniobacteriales]

# Family

Biolex® MB40 (T1)

Leiber® ExCel (T2)

Control (C)

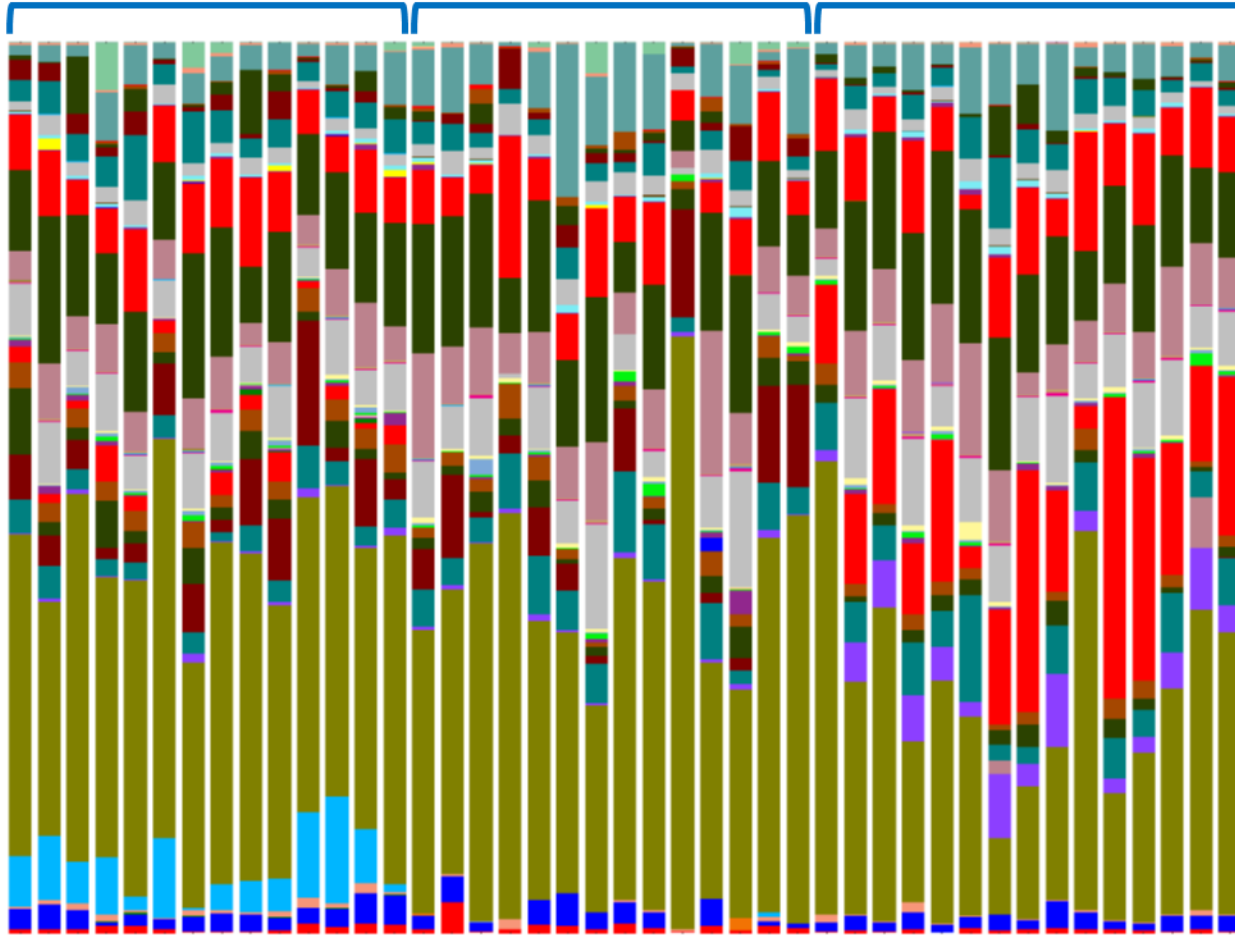

# Family legends

|                                                                                                                                 |                                                                                                                                       |
|---------------------------------------------------------------------------------------------------------------------------------|---------------------------------------------------------------------------------------------------------------------------------------|
| <span style="color: red;">■</span> Unassigned;Other;Other;Other;Other                                                           | <span style="color: purple;">■</span> k_Bacteria;p_Firmicutes;c_Clostridia;o_Clostridiales;f_Eubacteriaceae                           |
| <span style="color: blue;">■</span> k_Archaea;p_Euryarchaeota;c_Methanobacteria;o_Methanobacteriales;f_Methanobacteriaceae      | <span style="color: brown;">■</span> k_Bacteria;p_Firmicutes;c_Clostridia;o_Clostridiales;f_Lachnospiraceae                           |
| <span style="color: orange;">■</span> k_Archaea;p_Euryarchaeota;c_Methanomicrobia;o_Methanomicrobiales;f_Methanocorpusculaceae  | <span style="color: teal;">■</span> k_Bacteria;p_Firmicutes;c_Clostridia;o_Clostridiales;f_Peptococcaceae                             |
| <span style="color: green;">■</span> k_Archaea;p_Euryarchaeota;c_Thermoplasmata;o_E2;f_[Methanomassiliicoccaceae]               | <span style="color: darkred;">■</span> k_Bacteria;p_Firmicutes;c_Clostridia;o_Clostridiales;f_Peptostreptococcaceae                   |
| <span style="color: purple;">■</span> k_Bacteria;Other;Other;Other;Other                                                        | <span style="color: black;">■</span> k_Bacteria;p_Firmicutes;c_Clostridia;o_Clostridiales;f_Ruminococcaceae                           |
| <span style="color: yellow;">■</span> k_Bacteria;p_Actinobacteria;c_Acidimicrobia;o_Acidimicrobiales;f_                         | <span style="color: darkgreen;">■</span> k_Bacteria;p_Firmicutes;c_Clostridia;o_Clostridiales;f_Syntrophomonadaceae                   |
| <span style="color: cyan;">■</span> k_Bacteria;p_Actinobacteria;c_Actinobacteria;o_Actinomycetales;f_Brevibacteriaceae          | <span style="color: red;">■</span> k_Bacteria;p_Firmicutes;c_Clostridia;o_Clostridiales;f_Veillonellaceae                             |
| <span style="color: pink;">■</span> k_Bacteria;p_Actinobacteria;c_Actinobacteria;o_Actinomycetales;f_Corynebacteriaceae         | <span style="color: blue;">■</span> k_Bacteria;p_Firmicutes;c_Clostridia;o_Clostridiales;f_[Mogibacteriaceae]                         |
| <span style="color: teal;">■</span> k_Bacteria;p_Actinobacteria;c_Actinobacteria;o_Actinomycetales;f_Microbacteriaceae          | <span style="color: orange;">■</span> k_Bacteria;p_Firmicutes;c_Clostridia;o_Clostridiales;f_[Tissierellaceae]                        |
| <span style="color: brown;">■</span> k_Bacteria;p_Actinobacteria;c_Actinobacteria;o_Actinomycetales;f_Micrococcaceae            | <span style="color: green;">■</span> k_Bacteria;p_Firmicutes;c_Clostridia;o_SHA-98;f_                                                 |
| <span style="color: grey;">■</span> k_Bacteria;p_Actinobacteria;c_Actinobacteria;o_Actinomycetales;f_Nocardioideaceae           | <span style="color: purple;">■</span> k_Bacteria;p_Firmicutes;c_Erysipelotrichi;o_Erysipelotrichales;f_Erysipelotrichaceae            |
| <span style="color: lightgreen;">■</span> k_Bacteria;p_Actinobacteria;c_Actinobacteria;o_Bifidobacteriales;f_Bifidobacteriaceae | <span style="color: yellow;">■</span> k_Bacteria;p_Fusobacteria;c_Fusobacteriia;o_Fusobacteriales;f_Fusobacteriaceae                  |
| <span style="color: peachpuff;">■</span> k_Bacteria;p_Actinobacteria;c_Coriobacteriia;o_Coriobacteriales;f_Coriobacteriaceae    | <span style="color: cyan;">■</span> k_Bacteria;p_Lentisphaerae;c_[Lentisphaeria];o_Victivallales;f_Victivallaceae                     |
| <span style="color: lightblue;">■</span> k_Bacteria;p_Actinobacteria;c_Thermoleophilii;o_Gaiellales;f_Gaiellaceae               | <span style="color: pink;">■</span> k_Bacteria;p_Planctomycetes;c_Planctomycetia;o_Gemmatales;f_Isoosphaeraceae                       |
| <span style="color: orange;">■</span> k_Bacteria;p_Actinobacteria;c_Thermoleophilii;o_Solirubrobacterales;Other                 | <span style="color: brown;">■</span> k_Bacteria;p_Proteobacteria;c_Alphaproteobacteria;o_                                             |
| <span style="color: lightgreen;">■</span> k_Bacteria;p_Actinobacteria;c_Thermoleophilii;o_Solirubrobacterales;f_                | <span style="color: teal;">■</span> k_Bacteria;p_Proteobacteria;c_Alphaproteobacteria;o_RF32;f_                                       |
| <span style="color: purple;">■</span> k_Bacteria;p_Actinobacteria;c_Thermoleophilii;o_Solirubrobacterales;f_Conexibacteraceae   | <span style="color: grey;">■</span> k_Bacteria;p_Proteobacteria;c_Alphaproteobacteria;o_Rhizobiales;f_Bradyrhizobiaceae               |
| <span style="color: yellow;">■</span> k_Bacteria;p_Actinobacteria;c_Thermoleophilii;o_Solirubrobacterales;f_Patulibacteraceae   | <span style="color: lightgreen;">■</span> k_Bacteria;p_Proteobacteria;c_Alphaproteobacteria;o_Rhizobiales;f_Brucellaceae              |
| <span style="color: grey;">■</span> k_Bacteria;p_Actinobacteria;c_Thermoleophilii;o_Solirubrobacterales;f_Solirubrobacteraceae  | <span style="color: orange;">■</span> k_Bacteria;p_Proteobacteria;c_Alphaproteobacteria;o_Rhizobiales;f_Hyphomicrobionaceae           |
| <span style="color: magenta;">■</span> k_Bacteria;p_Bacteroidetes;c_Bacteroidia;o_Bacteroidales;Other                           | <span style="color: blue;">■</span> k_Bacteria;p_Proteobacteria;c_Alphaproteobacteria;o_Rhizobiales;f_Phylobacteriaceae               |
| <span style="color: cyan;">■</span> k_Bacteria;p_Bacteroidetes;c_Bacteroidia;o_Bacteroidales;f_                                 | <span style="color: peachpuff;">■</span> k_Bacteria;p_Proteobacteria;c_Alphaproteobacteria;o_Rhizobiales;f_Rhizobiaceae               |
| <span style="color: brown;">■</span> k_Bacteria;p_Bacteroidetes;c_Bacteroidia;o_Bacteroidales;f_BS11                            | <span style="color: lightgreen;">■</span> k_Bacteria;p_Proteobacteria;c_Alphaproteobacteria;o_Rhodospirillales;f_Rhodospirillaceae    |
| <span style="color: olive;">■</span> k_Bacteria;p_Bacteroidetes;c_Bacteroidia;o_Bacteroidales;f_Bacteroidaceae                  | <span style="color: purple;">■</span> k_Bacteria;p_Proteobacteria;c_Betaproteobacteria;Other;Other                                    |
| <span style="color: purple;">■</span> k_Bacteria;p_Bacteroidetes;c_Bacteroidia;o_Bacteroidales;f_Porphyrimonadaceae             | <span style="color: yellow;">■</span> k_Bacteria;p_Proteobacteria;c_Betaproteobacteria;o_Burkholderiales;Other                        |
| <span style="color: brown;">■</span> k_Bacteria;p_Bacteroidetes;c_Bacteroidia;o_Bacteroidales;f_Prevotellaceae                  | <span style="color: grey;">■</span> k_Bacteria;p_Proteobacteria;c_Betaproteobacteria;o_Burkholderiales;f_Alcaligenaceae               |
| <span style="color: teal;">■</span> k_Bacteria;p_Bacteroidetes;c_Bacteroidia;o_Bacteroidales;f_Rikenellaceae                    | <span style="color: magenta;">■</span> k_Bacteria;p_Proteobacteria;c_Betaproteobacteria;o_Burkholderiales;f_Comamonadaceae            |
| <span style="color: darkred;">■</span> k_Bacteria;p_Bacteroidetes;c_Bacteroidia;o_Bacteroidales;f_S24-7                         | <span style="color: cyan;">■</span> k_Bacteria;p_Proteobacteria;c_Betaproteobacteria;o_Burkholderiales;f_Oxalobacteraceae             |
| <span style="color: olive;">■</span> k_Bacteria;p_Bacteroidetes;c_Bacteroidia;o_Bacteroidales;f_[Barnesiellaceae]               | <span style="color: brown;">■</span> k_Bacteria;p_Proteobacteria;c_Betaproteobacteria;o_MND1;f_                                       |
| <span style="color: orange;">■</span> k_Bacteria;p_Bacteroidetes;c_Bacteroidia;o_Bacteroidales;f_[Odoribacteraceae]             | <span style="color: teal;">■</span> k_Bacteria;p_Proteobacteria;c_Betaproteobacteria;o_Nitrosomonadales;f_Nitrosomonadaceae           |
| <span style="color: red;">■</span> k_Bacteria;p_Bacteroidetes;c_Bacteroidia;o_Bacteroidales;f_[Paraprevotellaceae]              | <span style="color: purple;">■</span> k_Bacteria;p_Proteobacteria;c_Betaproteobacteria;o_Rhodocyclales;f_Rhodocyclaceae               |
| <span style="color: blue;">■</span> k_Bacteria;p_Chlamydiae;c_Chlamydiai;o_Chlamydiales;f_Chlamydiaceae                         | <span style="color: brown;">■</span> k_Bacteria;p_Proteobacteria;c_Deltaproteobacteria;o_Bdellovibrionales;f_Bdellovibrionaceae       |
| <span style="color: orange;">■</span> k_Bacteria;p_Chloroflexi;c_Thermomicrobia;o_JG30-KF-CM45;f_                               | <span style="color: teal;">■</span> k_Bacteria;p_Proteobacteria;c_Deltaproteobacteria;o_Desulfovibrionales;f_Desulfovibrionaceae      |
| <span style="color: green;">■</span> k_Bacteria;p_Deferribacteres;c_Deferribacteres;o_Deferribacterales;f_Deferribacteraceae    | <span style="color: darkred;">■</span> k_Bacteria;p_Proteobacteria;c_Epsilonproteobacteria;o_Campylobacteriales;f_Campylobacteraceae  |
| <span style="color: purple;">■</span> k_Bacteria;p_Elusimicrobia;c_Elusimicrobia;o_Elusimicrobiales;f_Elusimicrobiaceae         | <span style="color: black;">■</span> k_Bacteria;p_Proteobacteria;c_Epsilonproteobacteria;o_Campylobacteriales;f_Helicobacteraceae     |
| <span style="color: yellow;">■</span> k_Bacteria;p_Firmicutes;c_Bacilli;o_Bacillales;Other                                      | <span style="color: olive;">■</span> k_Bacteria;p_Proteobacteria;c_Gammaproteobacteria;o_Aeromonadales;f_Succinivibrionaceae          |
| <span style="color: cyan;">■</span> k_Bacteria;p_Firmicutes;c_Bacilli;o_Bacillales;f_                                           | <span style="color: red;">■</span> k_Bacteria;p_Proteobacteria;c_Gammaproteobacteria;o_Enterobacteriales;f_Enterobacteriaceae         |
| <span style="color: pink;">■</span> k_Bacteria;p_Firmicutes;c_Bacilli;o_Bacillales;f_Bacillaceae                                | <span style="color: blue;">■</span> k_Bacteria;p_Proteobacteria;c_Gammaproteobacteria;o_Legionellales;f_                              |
| <span style="color: teal;">■</span> k_Bacteria;p_Firmicutes;c_Bacilli;o_Bacillales;f_Staphylococcaceae                          | <span style="color: orange;">■</span> k_Bacteria;p_Proteobacteria;c_Gammaproteobacteria;o_Legionellales;f_Coxiellaceae                |
| <span style="color: brown;">■</span> k_Bacteria;p_Firmicutes;c_Bacilli;o_Lactobacillales;f_Aerococcaceae                        | <span style="color: green;">■</span> k_Bacteria;p_Proteobacteria;c_Gammaproteobacteria;o_Legionellales;f_Legionellaceae               |
| <span style="color: grey;">■</span> k_Bacteria;p_Firmicutes;c_Bacilli;o_Lactobacillales;f_Enterococcaceae                       | <span style="color: purple;">■</span> k_Bacteria;p_Proteobacteria;c_Gammaproteobacteria;o_Pasteurellales;f_Pasteurellaceae            |
| <span style="color: lightgreen;">■</span> k_Bacteria;p_Firmicutes;c_Bacilli;o_Lactobacillales;f_Lactobacillaceae                | <span style="color: yellow;">■</span> k_Bacteria;p_Proteobacteria;c_Gammaproteobacteria;o_Pseudomonadales;f_Moraxellaceae             |
| <span style="color: peachpuff;">■</span> k_Bacteria;p_Firmicutes;c_Bacilli;o_Lactobacillales;f_Leuconostocaceae                 | <span style="color: cyan;">■</span> k_Bacteria;p_Proteobacteria;c_Gammaproteobacteria;o_Pseudomonadales;f_Pseudomonadaceae            |
| <span style="color: lightblue;">■</span> k_Bacteria;p_Firmicutes;c_Bacilli;o_Lactobacillales;f_Streptococcaceae                 | <span style="color: pink;">■</span> k_Bacteria;p_Spirochaetes;c_Spirochaetes;o_Sphaerochaetales;f_Sphaerochaetaceae                   |
| <span style="color: orange;">■</span> k_Bacteria;p_Firmicutes;c_Bacilli;o_Turicibacteriales;f_Turicibacteraceae                 | <span style="color: brown;">■</span> k_Bacteria;p_Synergistetes;c_Synergistia;o_Synergistales;f_Synergistaceae                        |
| <span style="color: lightgreen;">■</span> k_Bacteria;p_Firmicutes;c_Clostridia;Other;Other                                      | <span style="color: teal;">■</span> k_Bacteria;p_TM7;c_TM7-3;o_I025;f_Rs-045                                                          |
| <span style="color: purple;">■</span> k_Bacteria;p_Firmicutes;c_Clostridia;o_                                                   | <span style="color: grey;">■</span> k_Bacteria;p_Tenericutes;c_Mollicutes;o_Anaeroplasmatales;f_Anaeroplasmataceae                    |
| <span style="color: yellow;">■</span> k_Bacteria;p_Firmicutes;c_Clostridia;o_Clostridiales;Other                                | <span style="color: lightgreen;">■</span> k_Bacteria;p_Tenericutes;c_Mollicutes;o_Mycoplasmatales;f_Mycoplasmataceae                  |
| <span style="color: grey;">■</span> k_Bacteria;p_Firmicutes;c_Clostridia;o_Clostridiales;f_                                     | <span style="color: orange;">■</span> k_Bacteria;p_Tenericutes;c_Mollicutes;o_RF39;f_                                                 |
| <span style="color: magenta;">■</span> k_Bacteria;p_Firmicutes;c_Clostridia;o_Clostridiales;f_Christensenellaceae               | <span style="color: blue;">■</span> k_Bacteria;p_Verrucomicrobia;c_Opitutae;Other;Other                                               |
| <span style="color: cyan;">■</span> k_Bacteria;p_Firmicutes;c_Clostridia;o_Clostridiales;f_Clostridiaceae                       | <span style="color: peachpuff;">■</span> k_Bacteria;p_Verrucomicrobia;c_Opitutae;o_[Cerasiococcales];f_[Cerasiococcaceae]             |
| <span style="color: blue;">■</span> k_Bacteria;p_Firmicutes;c_Clostridia;o_Clostridiales;f_Dehalobacteriaceae                   | <span style="color: lightgreen;">■</span> k_Bacteria;p_Verrucomicrobia;c_Verrucomicrobiae;o_Verrucomicrobiales;f_Verrucomicrobiaceae  |
| <span style="color: olive;">■</span> k_Bacteria;p_Firmicutes;c_Clostridia;o_Clostridiales;f_EtOH8                               | <span style="color: purple;">■</span> k_Bacteria;p_Verrucomicrobia;c_[Spartobacteria];o_[Chthoniobacteriales];f_[Chthoniobacteraceae] |

# Genus

Biolex<sup>®</sup> MB40 (T1)

Leiber<sup>®</sup> ExCel (T2)

Control (C)

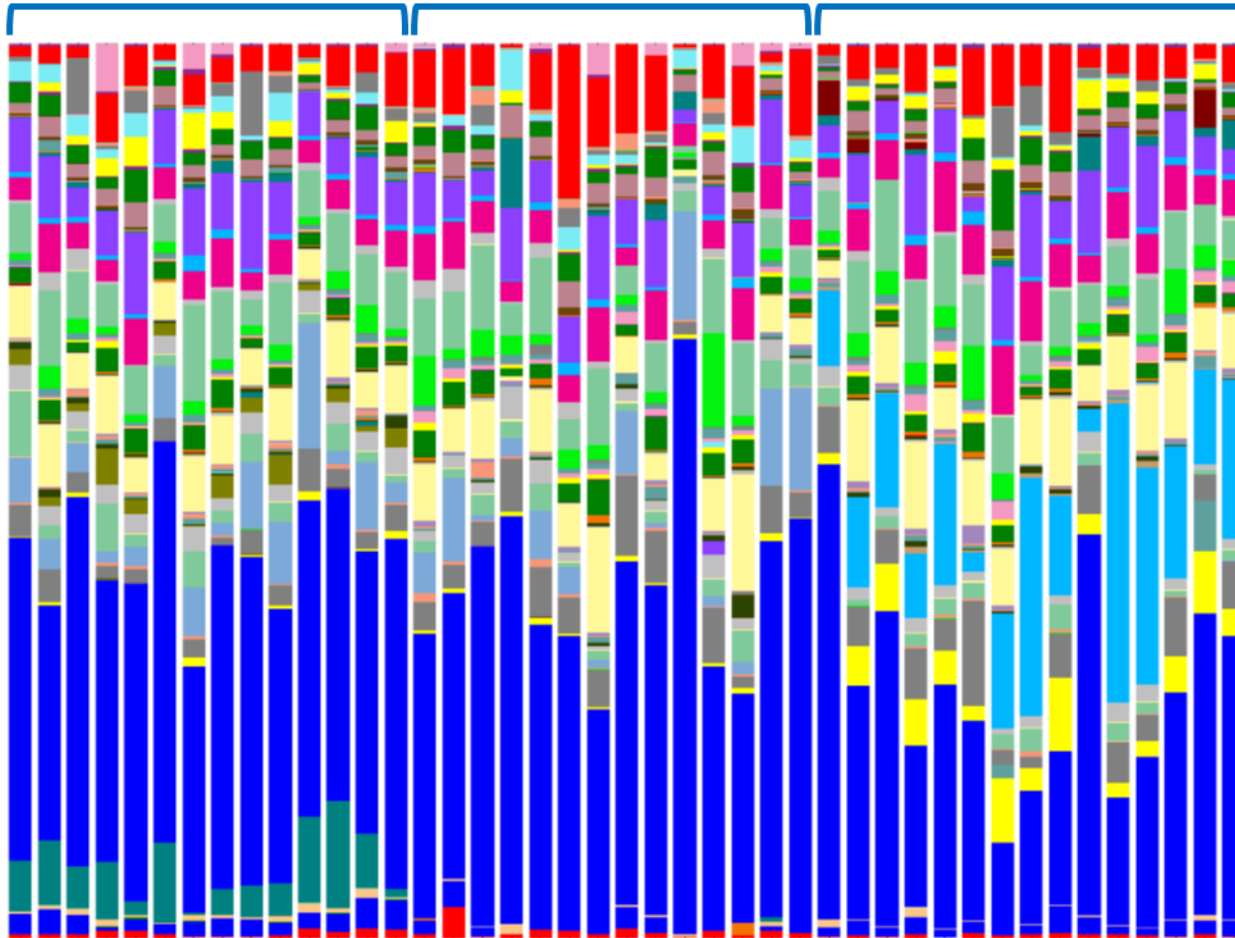

Supplement: pone.0151944.s001.pdf [file pone.0151944.s001.pdf]
